# Supplementary material for: Synthesis and Evaluation of Reactive Oxygen Species Sensitive Prodrugs of a NAMPT Inhibitor FK866
Source: MDPI journal article supplement (doi:10.3390/molecules28010169), 2022-12-25

# Synthesis and Evaluation of Reactive Oxygen Species Sensitive Prodrugs of a NAMPT Inhibitor FK866

Zili Xu <sup>1,2,3,†</sup>, Huihui Wang <sup>1,3,4,†</sup>, Haixia Liu <sup>1,2,3</sup>, Hongli Chen <sup>1,3,\*</sup> and Biao Jiang <sup>1,3,\*</sup>

<sup>1</sup> Shanghai Institute for Advanced Immunochemical Studies, ShanghaiTech University, 393 Middle Huaxia Road, Pudong, Shanghai 201210

<sup>2</sup> School of Physical Science and Technology, ShanghaiTech University, 393 Middle Huaxia Road, Shanghai 201210, China

<sup>3</sup> University of Chinese Academy of Sciences, 19A Yuquan Road, Shijingshan District, Beijing 100049, China

<sup>4</sup> School of Life Science and Technology, ShanghaiTech University, 393 Middle Huaxia Road, Shanghai 201210, China

\* Correspondence: chenhl@shanghaitech.edu.cn (H.C.);  
jiangbiao@shanghaitech.edu.cn (B.J.)

† These authors contributed equally to this work.

<sup>1</sup>H NMR of **122-001**:

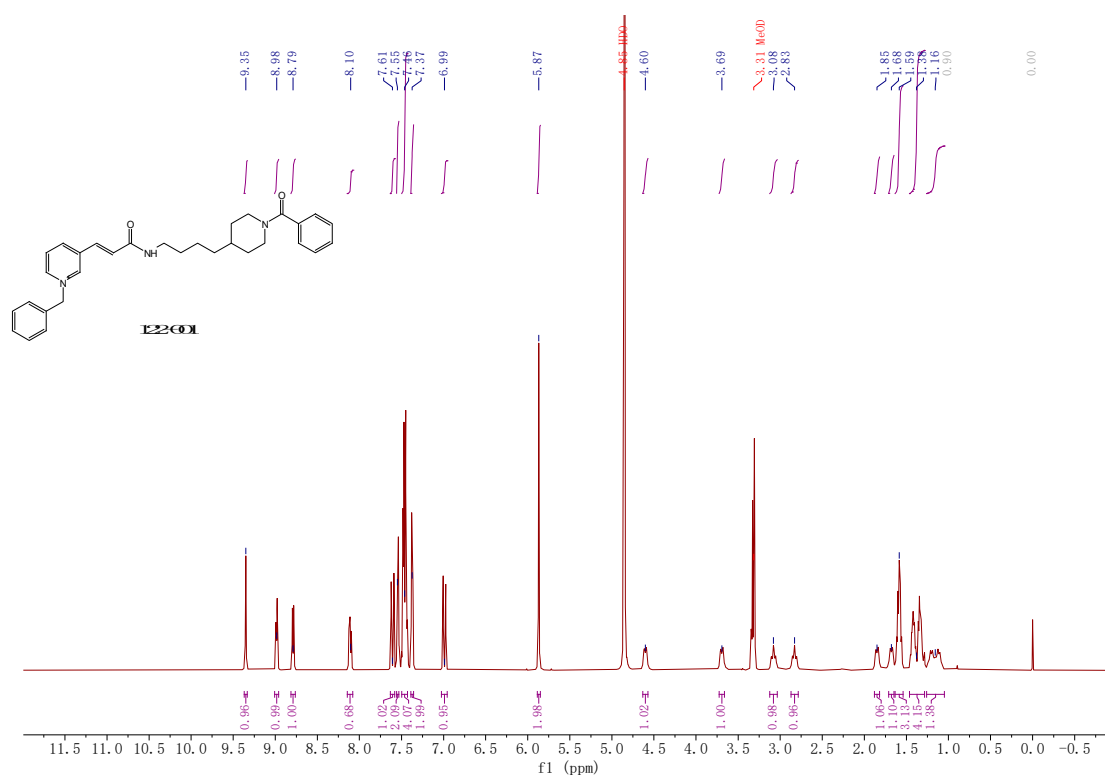

<sup>13</sup>C NMR of **122-001**

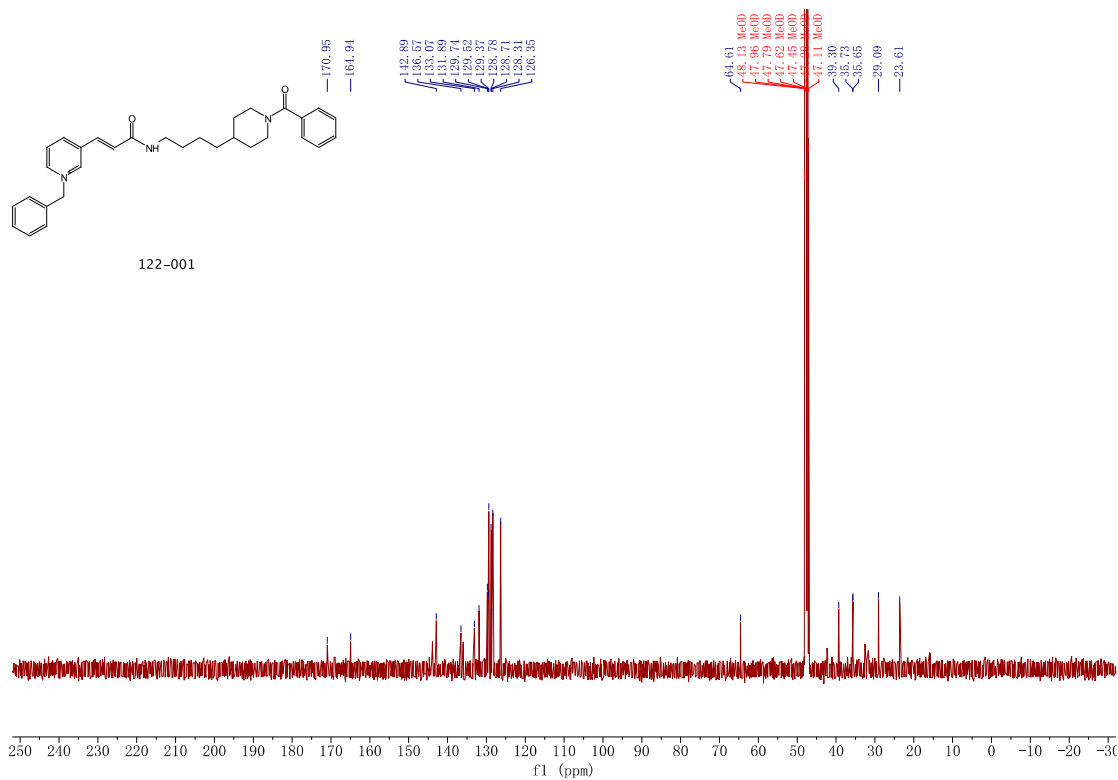

<sup>1</sup>H NMR of **122-052**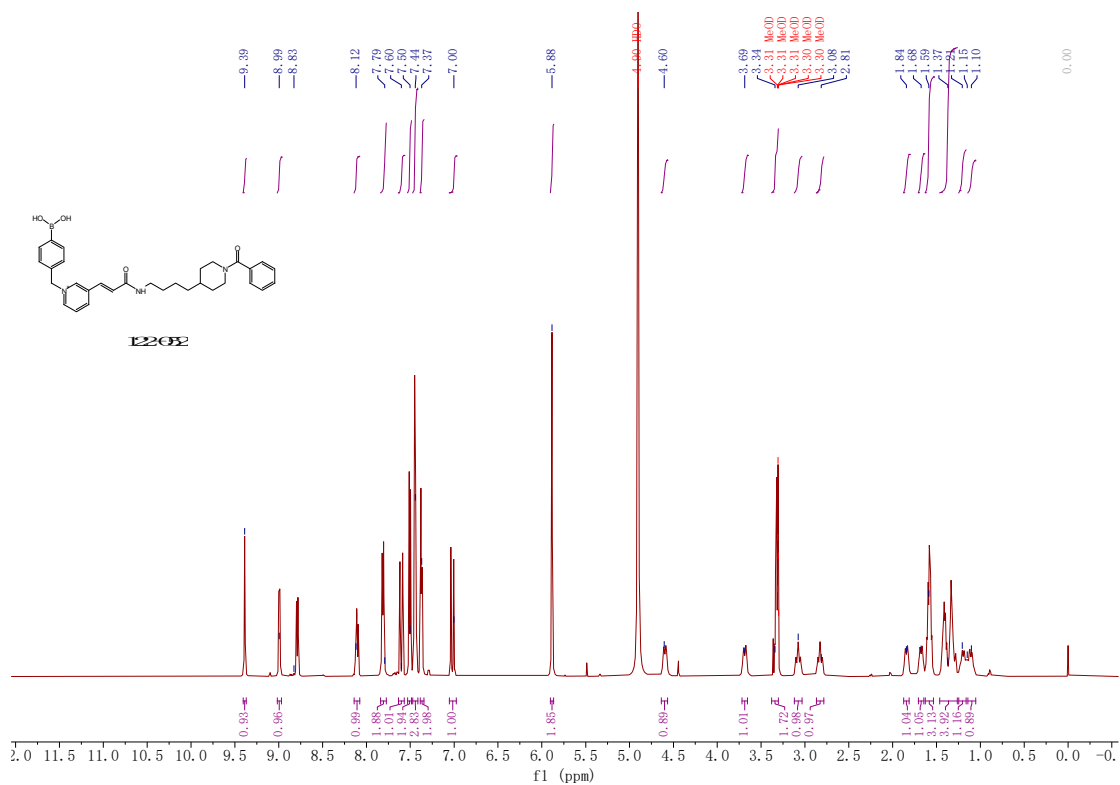 $^{13}\text{C}$  NMR of **122-052**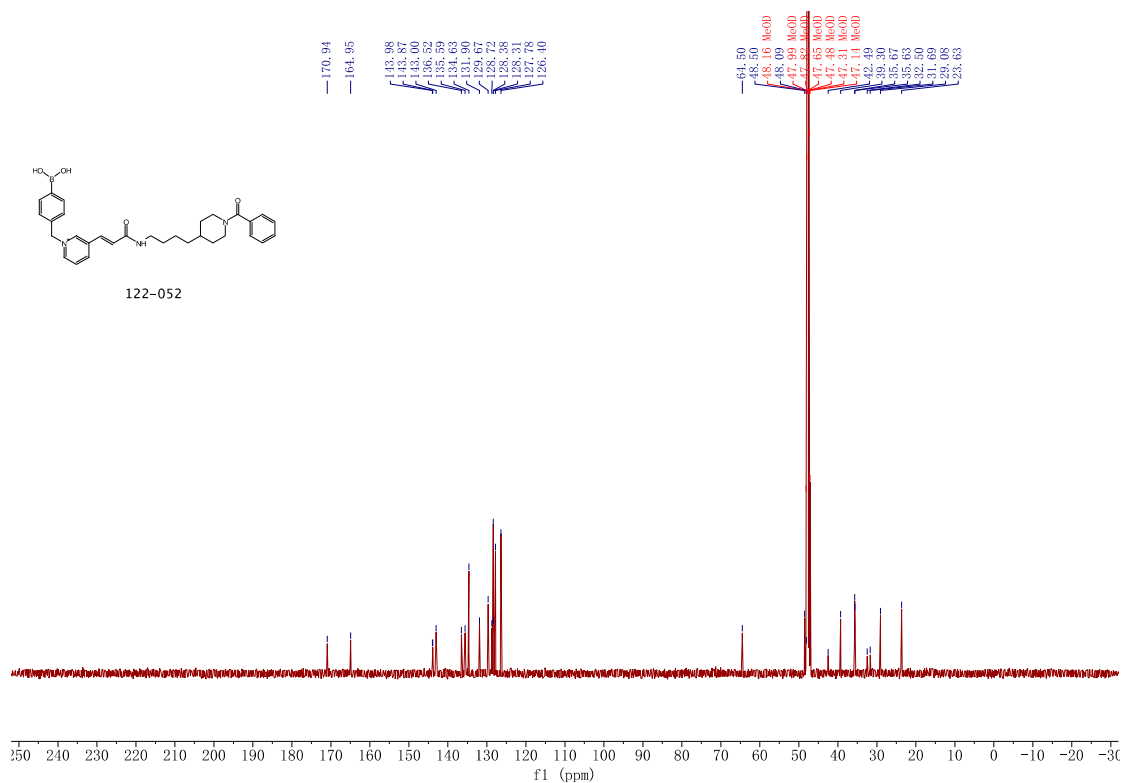

# <sup>1</sup>H NMR of compound 2

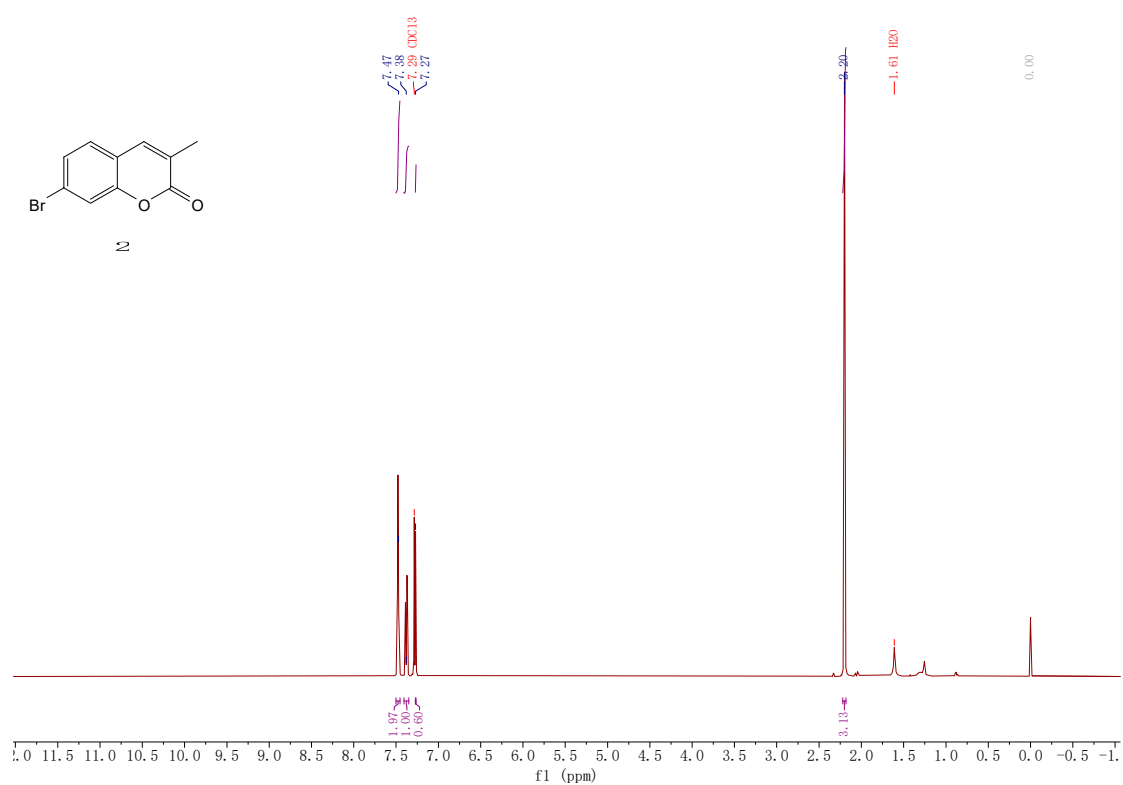

# <sup>13</sup>C NMR of compound 2

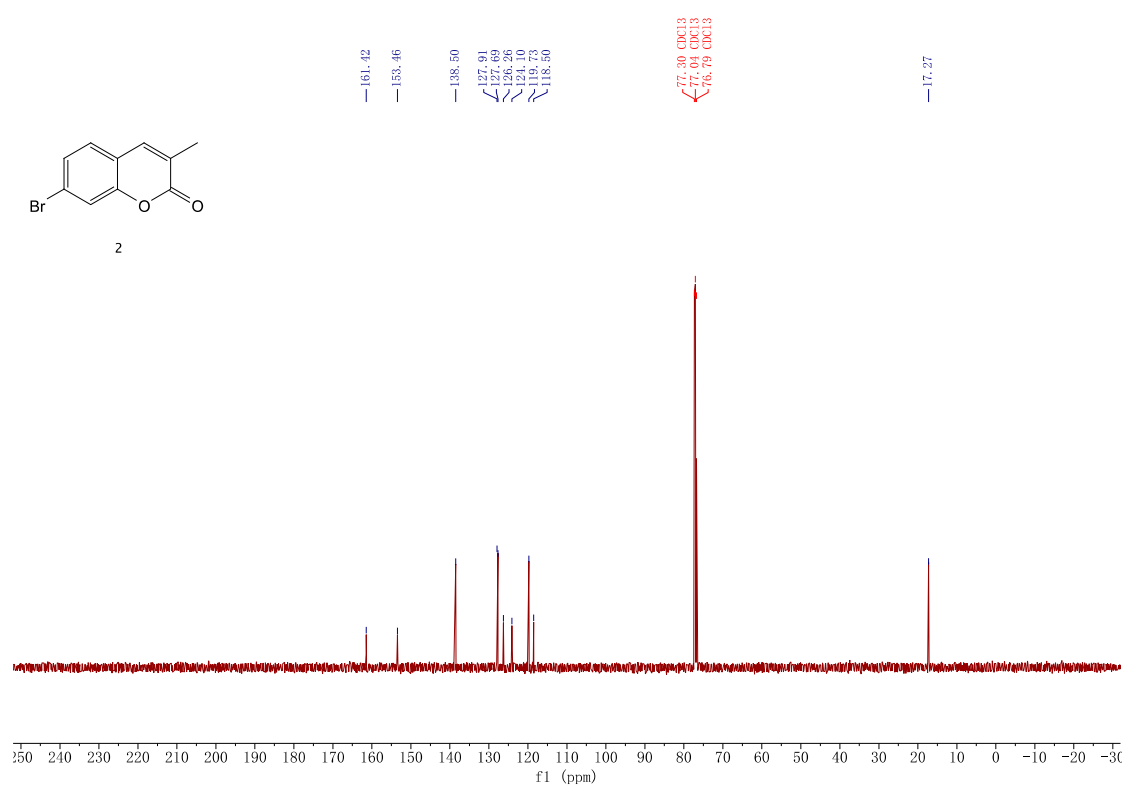

<sup>1</sup>H NMR of compound **3**

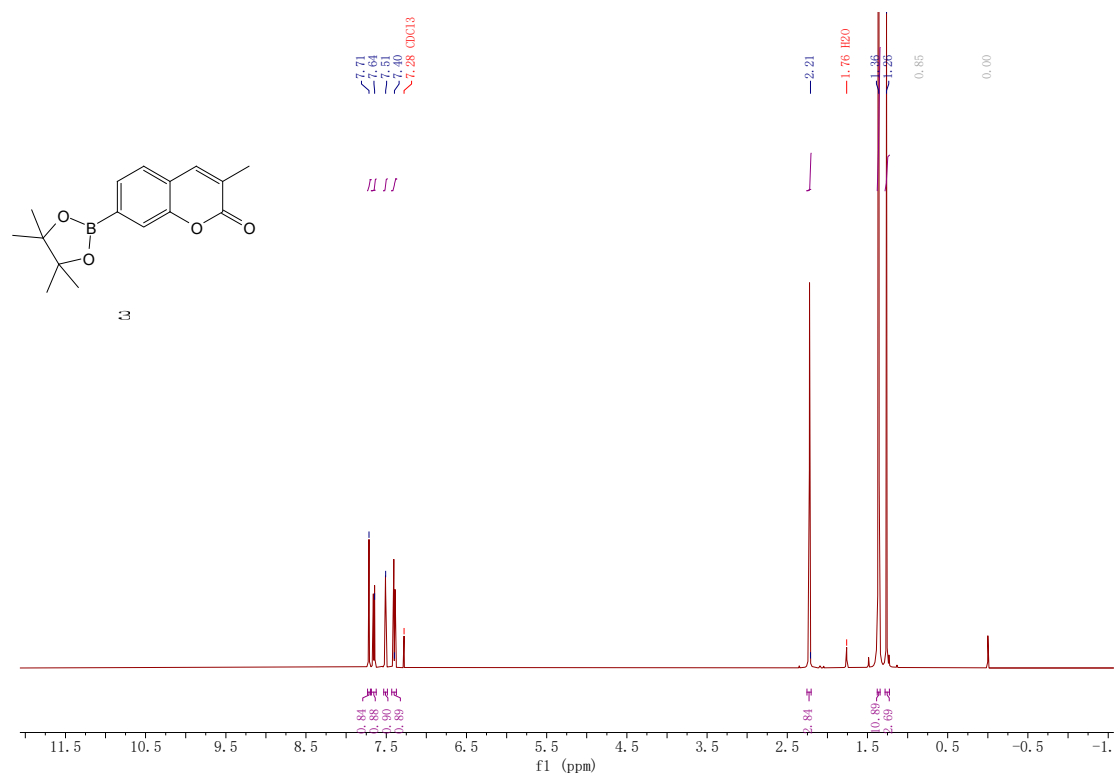

<sup>13</sup>C NMR of compound **3**

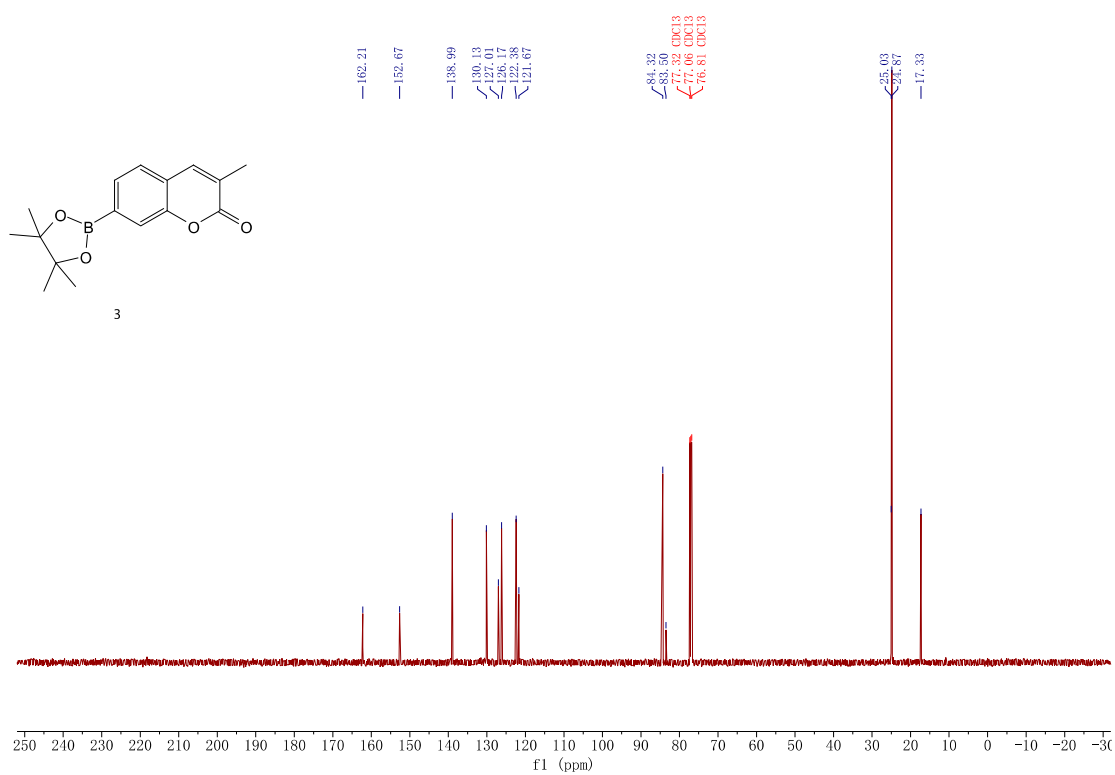

<sup>1</sup>H NMR of compound **4**

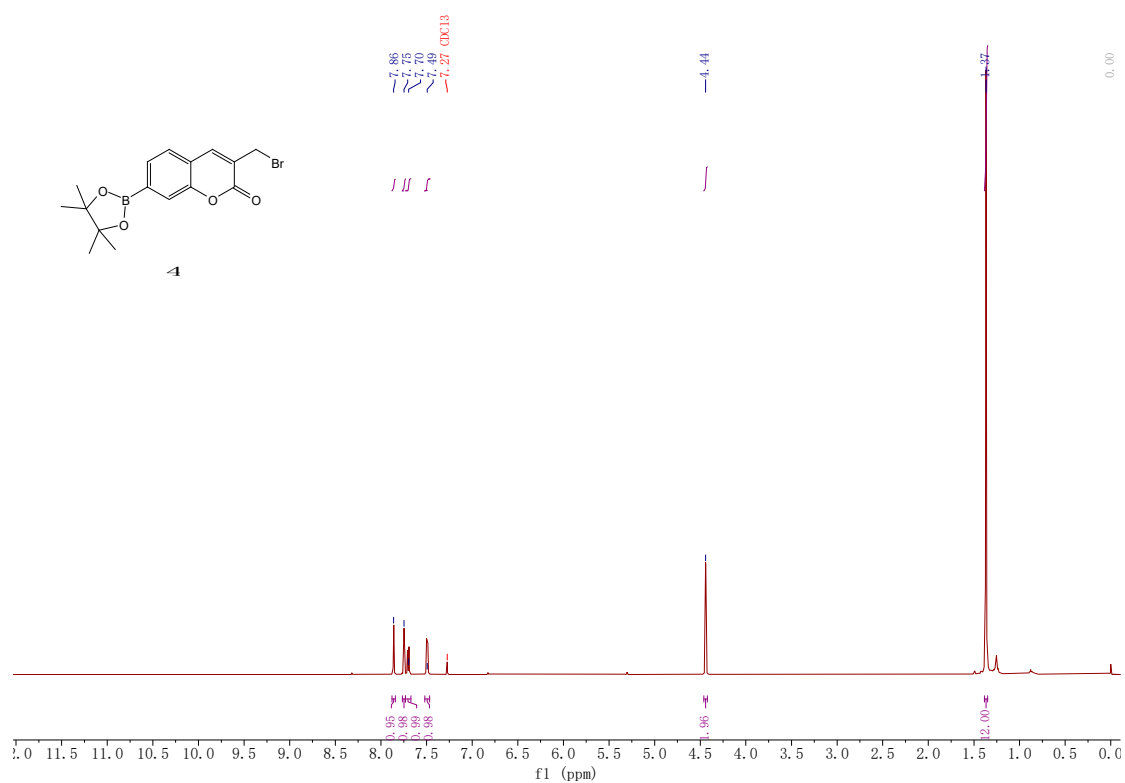

<sup>13</sup>C NMR of compound **4**

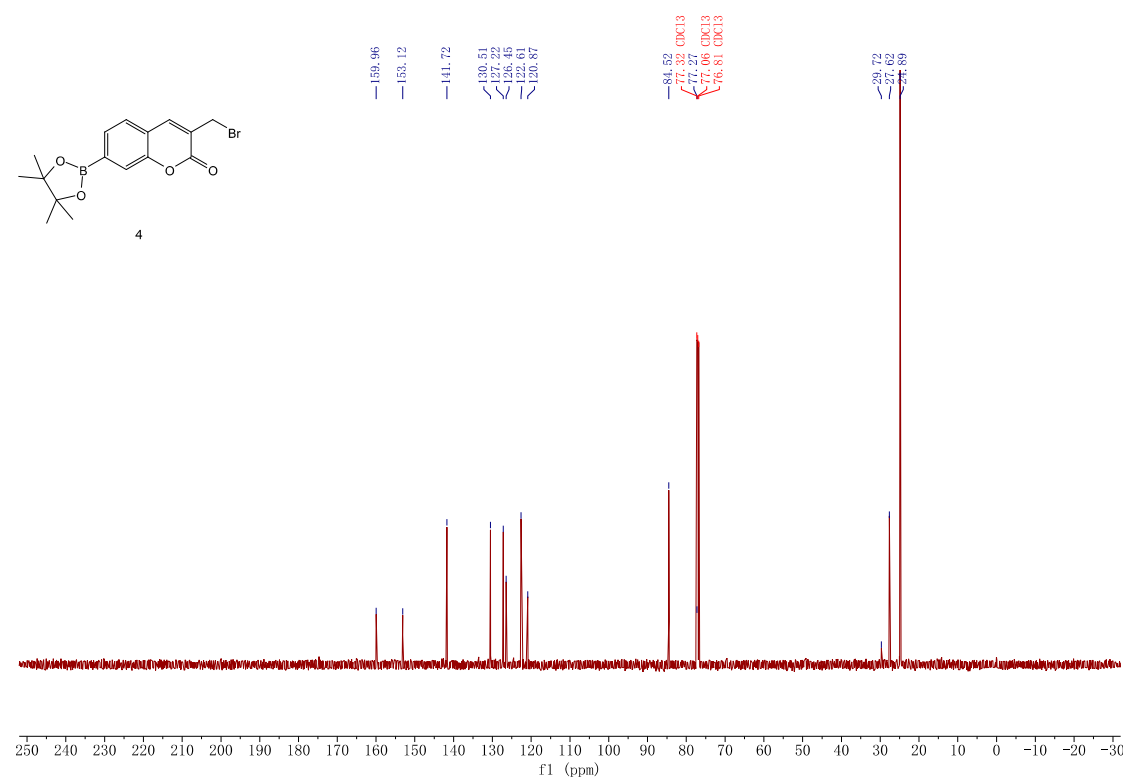

<sup>1</sup>H NMR of **122-066**

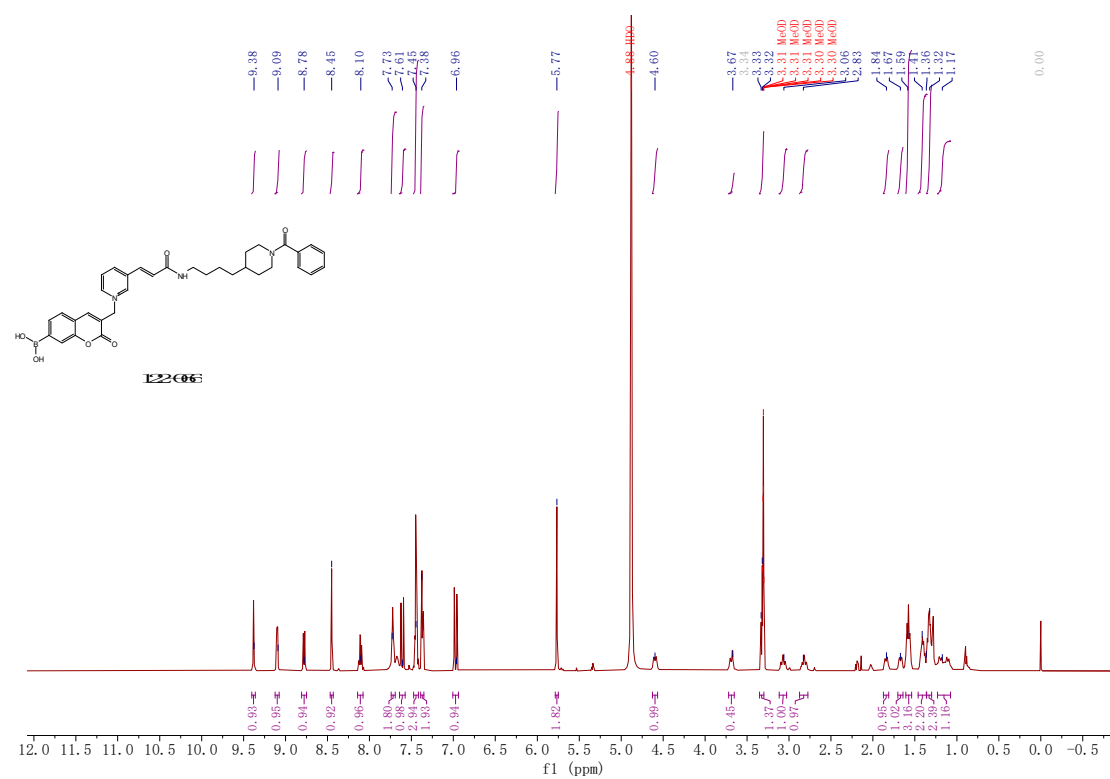

<sup>13</sup>C NMR of **122-066**

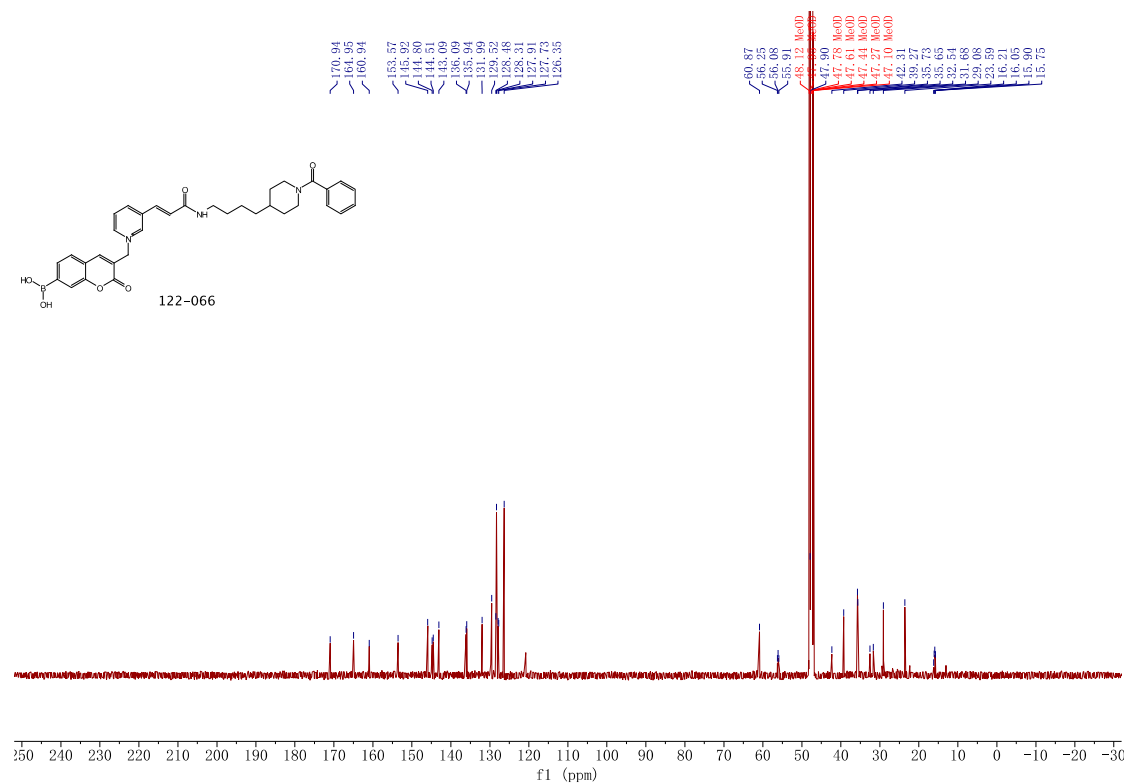

Supplement: s1 [file s1]
